# Supplementary material for: Understanding the Impact of Sociocultural Gender on Post-acute Sequelae of COVID-19: a Bayesian Approach
Source: bioRxiv or medRxiv preprint supplement (doi:10.1101/2021.06.30.21259757), 2022-05-23
Supplement: Supplementary file [file media-1.pdf]

# Supplementary Material

## Methods

### Study design and study population

Patients with laboratory confirmed SARS-CoV-2 infection diagnosed between February and December 2020 at one of the Swiss study sites were included in this study. We deliberately allowed for inclusion of patients in additional observational studies (data of 16 ICU patients were included in a previous observational study, PMID 32925314). In reporting this study, we have followed the STROBE guidelines for observational studies.<sup>1</sup> All SARS-CoV-2-positive individuals for whom contact information was available were screened for eligibility. Eligible patients were adults aged  $\geq 18$  years at follow-up who survived acute COVID-19 infection, residing in Switzerland at the time of SARS-CoV-2 infection and fluent in German, English, French, or Italian and able to provide informed consent. Both outpatients as well as hospitalized patients comprising normal ward, intermediate care, and intensive care unit (ICU) patients were included in our study.

### Follow-up questionnaire

The follow-up questionnaire consisted of 58 questions for women and 51 questions for men and contained questions on socio-demographics, lifestyle variables, medical comorbidities and risk factors, details on acute SARS-CoV-2 infection, current health status and symptoms, healthcare contacts since diagnosis, quality of life, gender-related and sex-specific parameters. Gender-related questions of the questionnaire are provided in **Supplementary Figure 3**.

### Procedures and data sources

Study team members were trained to follow a standardized guideline for telephone interviews. All questionnaire data were collected through the Research Electronic Data Capture (REDCap) survey system to minimise missing inputs and allow for real-time data

validation and quality control.<sup>2,3</sup> Clinical data of each patient that has been collected during hospital stay was obtained from electronic medical records and contained information about demographic characteristics (age, sex, cardiovascular risk factors including diabetes mellitus, hypertension, dyslipidemia, family history of coronary artery disease, smoking, and obesity), symptoms and symptom onset time, medication, pre-existing comorbidities, data on weight and height, laboratory parameters, and disease severity of COVID-19 as classified according to symptoms and necessity of in-hospital (normal ward/intermediate or intensive care) treatment. Items related to the sociocultural dimension gender were assessed by questionnaires as reported earlier.<sup>4,5</sup> The study team entered and stored these data in the dedicated electronic database form REDCap which was hosted locally at the University Hospital of Basel.

## **Definitions**

Acute COVID-19 was defined as symptoms, consequences, and healthcare contacts within four weeks of first diagnosis. The disease severity during acute COVID-19 was characterised by (1) a three-category scale which consisted of the following categories: not admitted to hospital, admitted to normal ward, admitted to intermediate care or intensive care unit, and by having experienced more than five symptoms during the first week of illness as previously described.<sup>6</sup> No prespecified definition of post-COVID syndrome was applied and patients were asked to indicate when their symptoms were present and if/when symptoms had resolved at the time of follow-up. To assure completeness of patient history at the time of follow-up, patients were asked to retrospectively recount the presence or absence of symptoms during the acute phase of COVID-19 and whether symptoms persisted at the time of follow-up. More than one symptom could be reported. The overall quality of life was assessed by using a five-category scale (“currently much better than before COVID-19”, “currently slightly better than before COVID-19”, “about the same as before COVID-19”, “currently slightly worse than before COVID-19”, “currently much worse than before COVID-19”). To capture the longer-term effects of SARS-CoV-2 infection, we evaluated whether

participants who were symptomatic in the acute phase had fully recovered compared to their normal health status before infection using a two-category scale (feeling “recovered and symptom free” or “not symptom free”.) The presence and type of any new or ongoing symptoms since the acute illness was assessed using a comprehensive list of symptoms. Additionally, the research team reviewed and coded comments in free text fields for further new or ongoing symptoms not captured by the preconceived questionnaire. Further, patients were asked in the questionnaire to elaborate on their experience in free text for the following areas: pre-existing comorbidities (if not captured by the preconceived questionnaire), medications prior to COVID-19 infection (if not captured by the preconceived questionnaire), and specific hormone treatments (if not captured by the preconceived questionnaire). Body mass index was calculated from height and weight and obesity was defined as body mass index of 30kg/m<sup>2</sup> or more. Gender-related variables were assessed by using a validated Canadian-Swiss questionnaire that was adapted for the German and Swiss societal system<sup>7,8</sup> and shortened to cover the most relevant issues in these societies.<sup>4</sup> The gender questionnaire is provided in **Supplementary Figure 3**.

### **Statistical analyses**

The primary outcome of persistent symptoms at a minimum of 60 days following acute SARS-CoV-2 infection was addressed with multiple logistic regression models. The total number of missing observations was generally low and varied between 0-2% for the variables in the full association model, and between 0-2% for both women and men. Besides age, biological sex, body mass index, pre-existing comorbidities and cardiovascular risk factors (including smoking), the multivariable models incorporated femininity as assessed by BEM scale (short version), self-assessment of gender identity, perceived social standing, housework responsibility status, and education level. In the regression models, we used variables that were recently discussed in the literature to be associated with persistent symptoms after COVID-19 illness, and variables that are historically different between women and men (employment status, perceived social standing, housework responsibility status, education

level, social support, stress at home) as well as a measure for gender identity. This enabled us to measure the distribution of sociocultural variables between women and men. Resulting estimates are shown as odds ratios (OR) with 95% confidence intervals, overall and in subgroups of female and male patients. No variable selection based on statistical reasons was performed because the number of outcome events per variable was large enough, following the suggestion by Ogundimu et al.<sup>9</sup> indicating that 20 events per variable would be sufficient to eliminate bias in regression coefficients. Models were fitted to complete case (CC) populations first, in which all patients with missing data were excluded row-wise, and subsequently a sensitivity analysis with 100-fold multiply imputed (MI) data sets was performed.<sup>10</sup> The multiple imputation models consisted of all variables in the respective model, including the outcome. After multiple imputation the resulting parameter estimates were pooled using Rubin's formula. Estimates are shown in **Supplementary Tables 1-3**.

## Results

### Sex- and gender-related characteristics of the study population

At the time of acute COVID-19 illness 381 (30.1%) of the female study population were postmenopausal, 28 (7.3%) of postmenopausal women were taking hormone replacement therapies, 583 (47%) women were nulliparous, 472 (37%) women were multiparous. 275 (21.4%) women reported to have experienced pregnancy complications including gestational diabetes, gestational hypertension, or miscarriage. 45 women (3.6%) were pregnant at the time of acute COVID-19 illness. 21 (1.4%) men were taking testosterone supplements at the time of acute COVID-19 illness. Relative to men, women more often earned the lowest income in a household (42.9% vs 16.4%), were more often single parent (10.4% vs 5.8%), were more often divorced/separated (8.1% vs 5.4%), more often single (45.1% vs 43.5%), were more often widowed (3.1% vs 1.8%) and less often married/living in a partnership than men (43.7% vs 49.3%, **Table 2**), were more often the main person responsible for household work (56.3% vs 30.8%,  $p < 0.001$ ), and took over more responsibility than men for childcare/care of family members (score from 1 [minimum] to 6 [maximum]:  $1.94 \pm 2.28$  vs  $1.68 \pm 2.11$ ,  $p < 0.001$ ). There

was strong evidence for women reporting higher stress level at home than men (score  $3.72\pm 2.34$  vs  $3.04\pm 1.99$ ,  $p<0.001$ ). Women scored higher than men for behaviours traditionally considered as feminine as assessed by the BEM scale, such as lower levels of perceived social standing ( $3.13\pm 0.93$  vs  $3.00\pm 0.92$ ,  $p=0.001$ ) and self-reported more often a feminine gender identity (score:  $5.49\pm 1.33$  vs  $2.35\pm 1.46$ ,  $p<0.001$ ). There was no evidence for gender differences in education ( $p=0.116$ ), with 46.4% of women and 49.1% of men in our study population reported to have obtained a university or technical college degree (**Table 2**). 898 (32.3%) study participants lived alone with no evidence for a difference between men and women (33.6% women and 31.1% men,  $p=0.175$ ). Socioeconomic and behavioural characteristics of women and men are depicted in **Table 2**.

### **Post COVID-19 sequelae**

Among individuals with persistent symptoms, the most frequent symptom reported at follow-up was reduced exercise tolerance and reduced resilience, which was reported by 43% of men and 41% of women (**Figure 3**), followed by dysosmia/anosmia (32% of women and 27% of men), shortness of breath (31% of women and 30% of men), concentration deficits (27% of women and 24% of men), memory deficits (26% of women and 25% of men), dysgeusia (22% of women and 19% of men), joint complaints (20% of women and 19% of men), headache (19% of women and 16% of men), depression and anxiety (14% of women and 12% of men), chest pain (11% of women and 12% of men), balance disturbances/vertigo (10% of women and 11% of men), and chronic fatigue (8% of women and 8% of men). In previously healthy patients, dysosmia/anosmia was the most commonly reported symptom in women (36%, **Supplementary Figure 1**), while reduced exercise tolerance/reduced resilience was the most commonly reported symptom in men (38% vs 36% in women). Conversely, in patients with pre-existing risk conditions and comorbidities, reduced exercise tolerance/reduced resilience was the most frequent symptom in both women and men (45% of women and 46% of men) followed by shortness of breath (36% of women and 35% of men) and concentration deficits (29% of women and 25% of men, **Supplementary Figure 2**). Similarly, both women and men who had been hospitalized for severe acute COVID-19

infection reported reduced exercise tolerance/reduced resilience, shortness of breath and concentration deficits as the three most frequent persisting symptoms (**Supplementary Figure 4 and 5**).

### **Symptoms and severity according to follow-up time**

Patients were considered recovered if they identified themselves as no longer experiencing symptoms at the time of follow-up. 498 individuals (39.7%, 275 [46.5%] women and 225 [33.8%] men, still reported symptoms at  $\geq 6$  months of follow-up. Conversely, 526 patients (33%, 275 women [39.2%] and 251 men [28.1%]) reported persistent symptoms at 2–6 months of follow-up. Similar to patients with shorter follow-up, patients who reported persistent symptoms after  $\geq 6$  months of follow-up were mainly troubled with reduced exercise tolerance and reduced resilience (44% and 40%, respectively, **Supplementary Figure 6**). However, while the second most common symptom was shortness of breath in patients after  $\geq 6$  months of follow-up (35% of patients), patients with shorter follow-up reported olfactory dysfunction as the second most common symptom (33% of patients). Patients with  $\geq 6$  months of follow-up were more often admitted to ICU during acute SARS-CoV2 infection (8.3% vs 4.0%,  $p < 0.001$ ), were significantly older  $47 \pm 17$  vs  $41 \pm 16$  years), had a higher BMI ( $26.0 \text{ kg/m}^2$  vs  $25.0 \text{ kg/m}^2$ ), had more often hypertension (18.8% vs 12.8%,  $p < 0.001$ ) or dyslipidaemia (9.7% vs 5.1%,  $p < 0.001$ ), pre-existing mental disease (6.3% vs 4.0%,  $p = 0.008$ ) or cancer (6.8% vs 3.8%,  $p = 0.001$ ), while there was weak evidence for differences between these groups for sex ( $p = 0.071$ ), pre-existing autoimmune disease ( $p = 0.112$ ), neurological disease ( $p = 0.067$ ), cardiovascular disease ( $p = 0.075$ ), and no evidence for differences for diabetes ( $p = 0.203$ ), smoking ( $p = 0.362$ ), or respiratory disease ( $p = 0.606$ ).

### **Sensitivity Analysis**

The sensitivity analysis based on 100-fold multiple imputation showed very robust results as compared to the complete case population. Results are shown in **Supplementary Tables 1-3**.

## References

1. Lachat C, Hawwash D, Ocké MC, et al. Strengthening the Reporting of Observational Studies in Epidemiology-Nutritional Epidemiology (STROBE-nut): An Extension of the STROBE Statement. *PLoS Med.* 2016;13(6):e1002036-e1002036.
2. Harris PA, Taylor R, Minor BL, et al. The REDCap consortium: Building an international community of software platform partners. *J Biomed Inform.* 2019;95:103208.
3. Harris PA, Taylor R, Thielke R, Payne J, Gonzalez N, Conde JG. Research electronic data capture (REDCap)--a metadata-driven methodology and workflow process for providing translational research informatics support. *J Biomed Inform.* 2009;42(2):377-381.
4. Nauman AT, Behlouli H, Alexander N, et al. Gender score development in the Berlin Aging Study II: a retrospective approach. *Biol Sex Differ.* 2021;12(1):15.
5. Kachel S, Steffens MC, Niedlich C. Traditional Masculinity and Femininity: Validation of a New Scale Assessing Gender Roles. *Frontiers in Psychology.* 2016;7(956).
6. Sudre CH, Murray B, Varsavsky T, et al. Attributes and predictors of long COVID. *Nat Med.* 2021;27(4):626-631.
7. Pelletier R, Ditto B, Pilote L. A composite measure of gender and its association with risk factors in patients with premature acute coronary syndrome. *Psychosom Med.* 2015;77(5):517-526.
8. Pelletier R, Khan NA, Cox J, et al. Sex Versus Gender-Related Characteristics: Which Predicts Outcome After Acute Coronary Syndrome in the Young? *J Am Coll Cardiol.* 2016;67(2):127-135.
9. Ogundimu EO, Altman DG, Collins GS. Adequate sample size for developing prediction models is not simply related to events per variable. *Journal of Clinical Epidemiology.* 2016;76:175-182.
10. White IR, Royston P, Wood AM. Multiple imputation using chained equations: Issues and guidance for practice. *Statistics in Medicine.* 2011;30(4):377-399.

## Supplementary Tables and Figures

| <b>Association Model for Post-COVID-19 Syndrome (Overall Population, n=2599)</b>  |           |                                   |                |
|-----------------------------------------------------------------------------------|-----------|-----------------------------------|----------------|
| <b>Results Based on 100-fold Multiple Imputation</b>                              |           |                                   |                |
| <b>Predictor Variables</b>                                                        | <b>OR</b> | <b>95% CI Confidence Interval</b> | <b>p-value</b> |
| Age (years)                                                                       | 1         | 1.00-1.01                         | 0.14           |
| Obesity (BMI $\geq$ 30 kg/m <sup>2</sup> )                                        | 1.35      | 1.05-1.72                         | 0.017          |
| Female sex                                                                        | 1.56      | 1.20-2.03                         | 0.0008         |
| <b>Characteristics of acute COVID-19 illness</b>                                  |           |                                   |                |
| > 5 symptoms during acute COVID-19 illness                                        | 2.79      | 2.35-3.31                         | < 0.0001       |
| Normal ward hospitalization for acute COVID-19<br>(reference: no hospitalization) | 1.7       | 1.27-2.27                         | 0.0003         |
| IMC or ICU hospitalization for acute COVID-19<br>(reference: no hospitalization)  | 4.49      | 3.06-6.61                         | < 0.0001       |
| <b>Pre-existing risk factors and comorbidities</b>                                |           |                                   |                |
| Presence of CVRFs                                                                 | 1.22      | 1.00-1.49                         | 0.053          |
| Known autoimmune or rheumatoid disease                                            | 1.16      | 0.84-1.6                          | 0.36           |
| Known cardiovascular disease                                                      | 1.18      | 0.89-1.57                         | 0.24           |
| Known cancer                                                                      | 0.98      | 0.67-1.44                         | 0.94           |
| Known respiratory disease                                                         | 1.3       | 0.95-1.79                         | 0.11           |
| Known mental illness                                                              | 1.68      | 1.14-2.48                         | 0.009          |
| Smoking                                                                           | 1.19      | 0.99-1.43                         | 0.069          |
| <b>Socioeconomic (Gender) variables</b>                                           |           |                                   |                |
| Single parent                                                                     | 1.38      | 1.01-1.9                          | 0.046          |
| Higher education                                                                  | 0.99      | 0.89-1.1                          | 0.82           |
| Earning lowest income in household                                                | 0.99      | 0.89-1.1                          | 0.86           |
| Being main person responsible for household work                                  | 0.93      | 0.83-1.05                         | 0.23           |
| Increased stress level at home                                                    | 1.09      | 1.05-1.14                         | < 0.0001       |
| Femininity as assessed by BEM scale                                               | 1.01      | 0.92-1.11                         | 0.79           |
| Self-assessment of gender identity                                                | 1.02      | 0.96-1.08                         | 0.54           |
| Being main person responsible for childcare/care of family members                | 0.94      | 0.90-0.98                         | 0.004          |

**Supplementary Table 1:** Results of the sensitivity analysis with 100-fold multiple imputation. Association model between demographic characteristics, acute COVID-19 illness, preexisting disease, sex- and gender-specific variables and the occurrence of post-COVID syndrome in the overall study population. BMI: Body mass index; CVRFs, cardiovascular risk factors.



| <b>Association Model for Post-COVID-19 Syndrome (Women, n=1188)</b>               |           |                                   |                |
|-----------------------------------------------------------------------------------|-----------|-----------------------------------|----------------|
| <b>Results Based on 100-fold Multiple Imputation</b>                              |           |                                   |                |
| <b>Predictor Variables</b>                                                        | <b>OR</b> | <b>95% CI Confidence Interval</b> | <b>p-value</b> |
| Age (years)                                                                       | 1         | 0.99-1.01                         | 0.97           |
| Obesity (BMI $\geq$ 30 kg/m <sup>2</sup> )                                        | 1.41      | 0.96-2.08                         | 0.081          |
| <b>Characteristics of acute COVID-19 illness</b>                                  |           |                                   |                |
| > 5 symptoms during acute COVID-19 illness                                        | 2.44      | 1.92-3.12                         | < 0.0001       |
| Normal ward hospitalization for acute COVID-19<br>(reference: no hospitalization) | 1.47      | 0.91-2.37                         | 0.11           |
| IMC or ICU hospitalization for acute COVID-19<br>(reference: no hospitalization)  | 3.6       | 1.71-7.58                         | 0.0008         |
| <b>Pre-existing risk factors and comorbidities</b>                                |           |                                   |                |
| Presence of CVRFs                                                                 | 1.37      | 0.73-1.68                         | 0.032          |
| Known autoimmune or rheumatoid disease                                            | 1.11      | 0.52-1.28                         | 0.62           |
| Known cardiovascular disease                                                      | 0.81      | 0.47-1.46                         | 0.37           |
| Known cancer                                                                      | 0.83      | 0.88-2.14                         | 0.52           |
| Known respiratory disease                                                         | 1.37      | 0.98-2.92                         | 0.17           |
| Known mental illness                                                              | 1.69      | 0.92-1.59                         | 0.057          |
| Smoking                                                                           | 1.21      | 0.73-1.68                         | 0.17           |
| <b>Female sex-specific variables</b>                                              |           |                                   |                |
| Pregnancy at the time of acute COVID-19 illness                                   | 0.49      | 0.24-1.02                         | 0.056          |
| Menopause                                                                         | 1.04      | 0.71-1.53                         | 0.85           |
| Postmenopausal HRT                                                                | 1.27      | 0.56-2.9                          | 0.57           |
| <b>Socioeconomic (Gender) variables</b>                                           |           |                                   |                |
| Single parent                                                                     | 1.5       | 0.98-2.3                          | 0.061          |
| Higher education                                                                  | 0.93      | 0.80-1.09                         | 0.39           |
| Earning lowest income in household                                                | 1.03      | 0.89-1.2                          | 0.69           |
| Being main person responsible for household work                                  | 1.13      | 0.93-1.36                         | 0.21           |
| Increased stress level at home                                                    | 1.15      | 1.09-1.22                         | < 0.0001       |
| Femininity as assessed by BEM scale                                               | 0.96      | 0.84-1.1                          | 0.54           |
| Self-assessment of gender identity                                                | 1.12      | 1.02-1.23                         | 0.02           |
| Being main person responsible for childcare/care of family members                | 0.89      | 0.83-0.95                         | 0.0002         |

**Supplementary Table 2:** Results of the sensitivity analysis with 100-fold multiple imputation. Association model between demographic characteristics, acute COVID-19 illness, preexisting disease, sex- and gender-specific variables and the occurrence of post-COVID syndrome in women. BMI: Body mass index; CVRFs, cardiovascular risk factors; HRT, hormone replacement therapy.

| <b>Association Model for Post-COVID-19 Syndrome (Men, n=1377)</b>                 |           |                                   |                |
|-----------------------------------------------------------------------------------|-----------|-----------------------------------|----------------|
| <b>Results Based on 100-fold Multiple Imputation</b>                              |           |                                   |                |
| <b>Predictor Variables</b>                                                        | <b>OR</b> | <b>95% CI Confidence Interval</b> | <b>p-value</b> |
| Age (years)                                                                       | 1.01      | 1.00-1.02                         | 0.23           |
| Obesity (BMI $\geq$ 30 kg/m <sup>2</sup> )                                        | 1.33      | 0.96-1.84                         | 0.088          |
| <b>Characteristics of acute COVID-19 illness</b>                                  |           |                                   |                |
| > 5 symptoms during acute COVID-19 illness                                        | 3.19      | 2.48-4.1                          | < 0.0001       |
| Normal ward hospitalization for acute COVID-19<br>(reference: no hospitalization) | 1.87      | 1.28-2.73                         | 0.001          |
| IMC or ICU hospitalization for acute COVID-19<br>(reference: no hospitalization)  | 4.8       | 3.02-7.64                         | < 0.0001       |
| <b>Pre-existing risk factors and comorbidities</b>                                |           |                                   |                |
| Presence of CVRFs                                                                 | 1.03      | 0.78-1.37                         | 0.83           |
| Known autoimmune or rheumatoid disease                                            | 1.33      | 0.79-2.25                         | 0.29           |
| Known cardiovascular disease                                                      | 1.44      | 1.00-2.09                         | 0.052          |
| Known cancer                                                                      | 1.15      | 0.68-1.95                         | 0.6            |
| Known respiratory disease                                                         | 1.25      | 0.77-2.01                         | 0.37           |
| Known mental illness                                                              | 1.73      | 0.96-3.13                         | 0.069          |
| Smoking                                                                           | 1.14      | 0.88-1.48                         | 0.33           |
| <b>Male sex-specific variables</b>                                                |           |                                   |                |
| Regular testosterone administration                                               | 1.95      | 0.73-5.21                         | 0.18           |
| <b>Socioeconomic (Gender) variables</b>                                           |           |                                   |                |
| Single parent                                                                     | 1.29      | 0.77-2.17                         | 0.33           |
| Higher education                                                                  | 1.03      | 0.88-1.2                          | 0.74           |
| Earning lowest income in household                                                | 1.02      | 0.86-1.21                         | 0.8            |
| Being main person responsible for household work                                  | 0.86      | 0.73-1.01                         | 0.071          |
| Increased stress level at home                                                    | 1.05      | 0.98-1.12                         | 0.13           |
| Femininity as assessed by BEM scale                                               | 1.08      | 0.94-1.23                         | 0.28           |
| Self-assessment of gender identity                                                | 0.98      | 0.90-1.06                         | 0.55           |
| Being main person responsible for childcare/care of family members                | 0.99      | 0.93-1.05                         | 0.77           |

**Supplementary Table 3:** Results of the sensitivity analysis with 100-fold multiple imputation. Association model between demographic characteristics, acute COVID-19 illness, preexisting disease, sex- and gender-specific variables and the occurrence of post-COVID syndrome in men. BMI: Body mass index; CVRFs, cardiovascular risk factors.

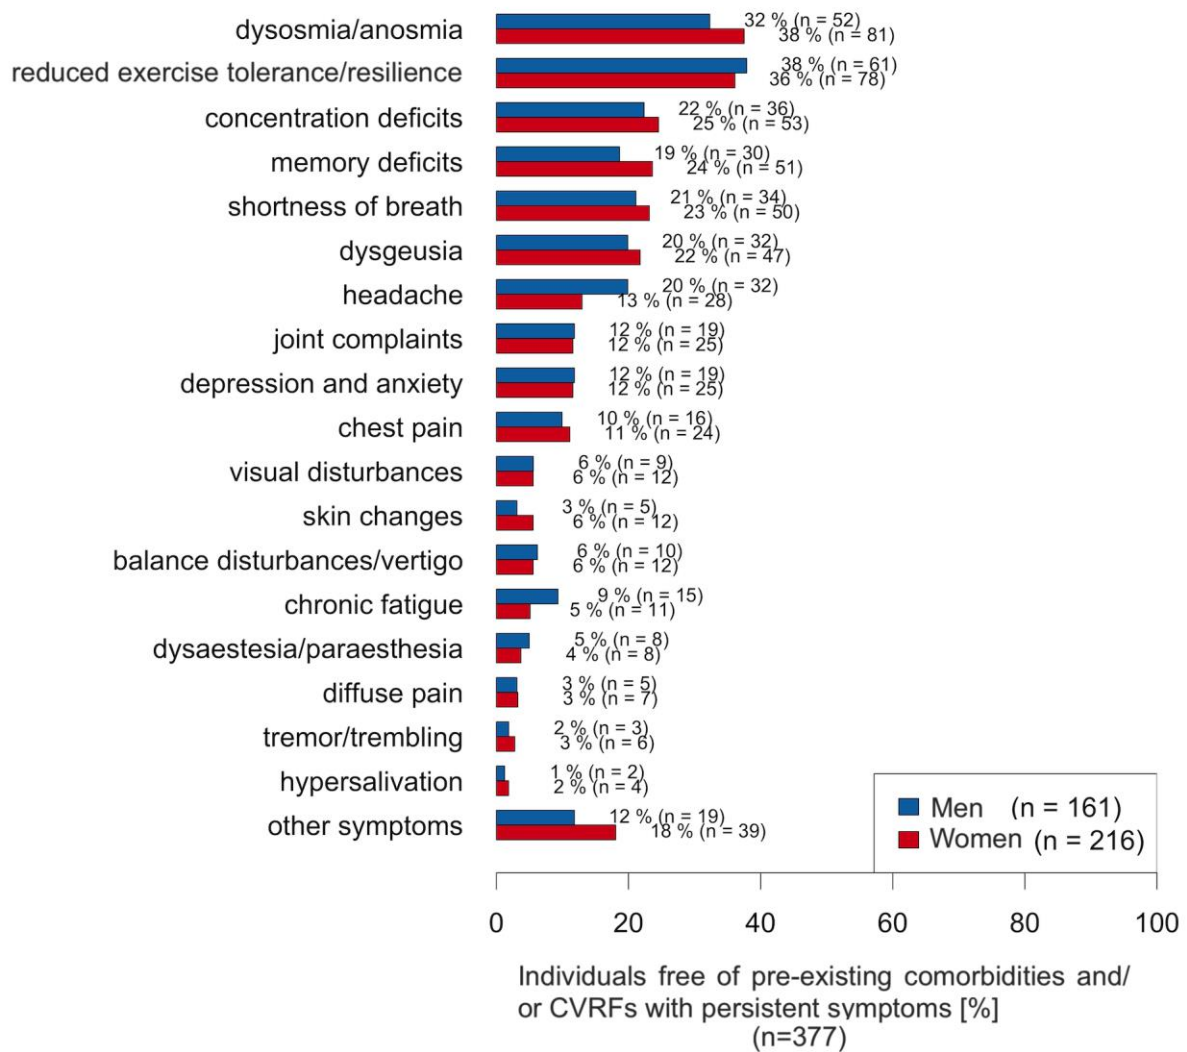

**Supplementary Figure 1:** Persistent symptoms in individuals free of pre-existing risk factors or comorbidities reported at follow-up stratified by sex and symptom. Data are presented as percentage of patients reporting persistent symptoms (n=377).

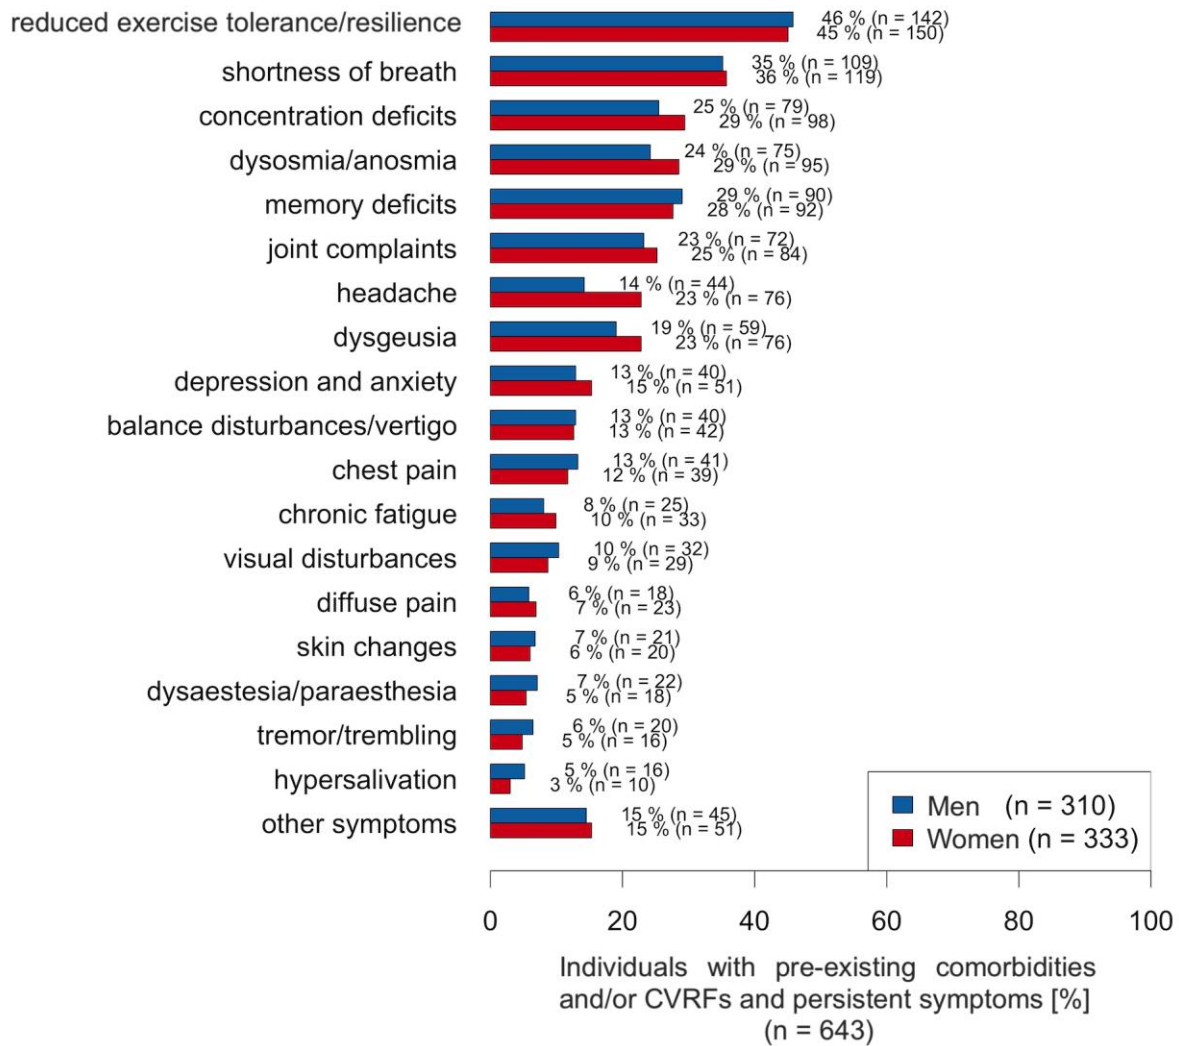

**Supplementary Figure 2:** Persistent symptoms in individuals with pre-existing risk factors or comorbidities reported at follow-up stratified by sex and symptom. Data are presented as percentage of patients reporting persistent symptoms (n=643).

Are/were you a single parent?  Yes  
 No  
 I do not have children

---

What is your marital status?  
 (Select **only one** answer)

Married, living together with spouse  
 Married, but permanently living apart  
 Registered same-sex partnership, living together  
 Registered same-sex partnership, living apart  
 Single, permanent partnership  
 Single, living alone  
 Divorced / partnership dissolved  
 Widowed / life partner deceased

---

What educational qualifications have you gained?  
 Only tick the highest degree that you gained.  
 (Select **only one** answer)

No degree  
 Completion of secondary education  
 Apprenticeship / vocational qualification, specialist baccalaureate, Higher school certificate  
 College, technical college or university

---

Do you earn the highest income in your household?

Yes  
 No  
 The partners contribute in roughly equal shares  
 I live alone

---

Are you the main person responsible for the household work in your household?

Yes  
 No  
 The partners contribute in roughly equal shares  
 I live alone

**On a scale of 1 to 10, how stressed are you at home?**

**Assign an appropriate number to yourself:**  
 (1) = No stress, (10) = Maximum stress

|                |                       |                       |                       |                       |                       |                       |                       |                       |                       |                       |
|----------------|-----------------------|-----------------------|-----------------------|-----------------------|-----------------------|-----------------------|-----------------------|-----------------------|-----------------------|-----------------------|
|                | (1)                   | (2)                   | (3)                   | (4)                   | (5)                   | (6)                   | (7)                   | (8)                   | (9)                   | (10)                  |
| Stress at home | <input type="radio"/> | <input type="radio"/> | <input type="radio"/> | <input type="radio"/> | <input type="radio"/> | <input type="radio"/> | <input type="radio"/> | <input type="radio"/> | <input type="radio"/> | <input type="radio"/> |

**To what extent are you responsible for the care or upbringing of children or grandchildren and/or the care of others living in your household?**

**Assign yourself an appropriate number:**  
 (0) = Not applicable  
 (1) = I have no responsibility  
 (6) = I take full responsibility

|                |                       |                       |                       |                       |                       |                       |                       |
|----------------|-----------------------|-----------------------|-----------------------|-----------------------|-----------------------|-----------------------|-----------------------|
|                | (0)                   | (1)                   | (2)                   | (3)                   | (4)                   | (5)                   | (6)                   |
| Responsibility | <input type="radio"/> | <input type="radio"/> | <input type="radio"/> | <input type="radio"/> | <input type="radio"/> | <input type="radio"/> | <input type="radio"/> |

**On a scale of 1 to 7, please rate the extent to which the following descriptions apply to you.**

(1) = Never true or almost never  
 (7) = True (nearly) always

**I am someone who...**

|                               |                       |                       |                       |                       |                       |                       |                       |
|-------------------------------|-----------------------|-----------------------|-----------------------|-----------------------|-----------------------|-----------------------|-----------------------|
|                               | (1)                   | (2)                   | (3)                   | (4)                   | (5)                   | (6)                   | (7)                   |
| ... defends his own opinion.  | <input type="radio"/> | <input type="radio"/> | <input type="radio"/> | <input type="radio"/> | <input type="radio"/> | <input type="radio"/> | <input type="radio"/> |
| ... has leadership qualities. | <input type="radio"/> | <input type="radio"/> | <input type="radio"/> | <input type="radio"/> | <input type="radio"/> | <input type="radio"/> | <input type="radio"/> |
| ... is independent.           | <input type="radio"/> | <input type="radio"/> | <input type="radio"/> | <input type="radio"/> | <input type="radio"/> | <input type="radio"/> | <input type="radio"/> |
| ... is willing to take risks. | <input type="radio"/> | <input type="radio"/> | <input type="radio"/> | <input type="radio"/> | <input type="radio"/> | <input type="radio"/> | <input type="radio"/> |
| ... is positive.              | <input type="radio"/> | <input type="radio"/> | <input type="radio"/> | <input type="radio"/> | <input type="radio"/> | <input type="radio"/> | <input type="radio"/> |
| ... is assertive.             | <input type="radio"/> | <input type="radio"/> | <input type="radio"/> | <input type="radio"/> | <input type="radio"/> | <input type="radio"/> | <input type="radio"/> |
| ... has a strong personality. | <input type="radio"/> | <input type="radio"/> | <input type="radio"/> | <input type="radio"/> | <input type="radio"/> | <input type="radio"/> | <input type="radio"/> |
| ... is ready to take a stand. | <input type="radio"/> | <input type="radio"/> | <input type="radio"/> | <input type="radio"/> | <input type="radio"/> | <input type="radio"/> | <input type="radio"/> |
| ... is energetic.             | <input type="radio"/> | <input type="radio"/> | <input type="radio"/> | <input type="radio"/> | <input type="radio"/> | <input type="radio"/> | <input type="radio"/> |
| ... is aggressive.            | <input type="radio"/> | <input type="radio"/> | <input type="radio"/> | <input type="radio"/> | <input type="radio"/> | <input type="radio"/> | <input type="radio"/> |

**If you assess yourself: Do you have only male or only female characteristics or both?**

**Assign a corresponding number to yourself:**  
 (1) = more male characteristics  
 (7) = more female characteristics

|                     |                       |                       |                       |                       |                       |                       |                       |
|---------------------|-----------------------|-----------------------|-----------------------|-----------------------|-----------------------|-----------------------|-----------------------|
|                     | (1)                   | (2)                   | (3)                   | (4)                   | (5)                   | (6)                   | (7)                   |
| I feel that I am... | <input type="radio"/> | <input type="radio"/> | <input type="radio"/> | <input type="radio"/> | <input type="radio"/> | <input type="radio"/> | <input type="radio"/> |

**Supplementary Figure 3: Gender- related questions included in the questionnaire.**

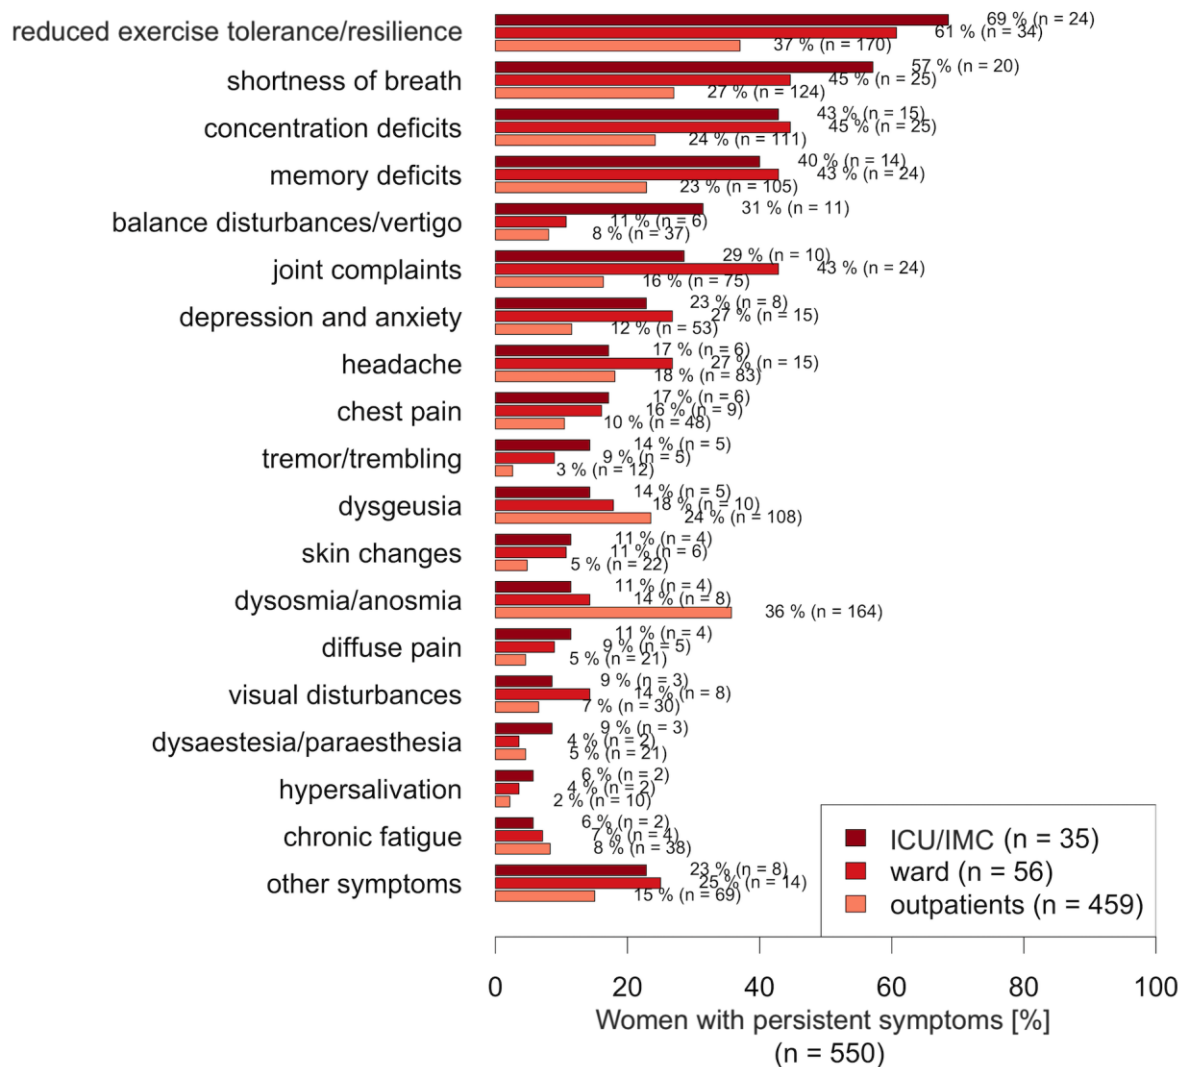

**Supplementary Figure 4:** Persistent symptoms in women stratified by disease severity of acute COVID-19 illness. IMC, intermediate care unit; ICU, intensive care unit. Data are presented as percentage of women reporting persistent symptoms (n=550).

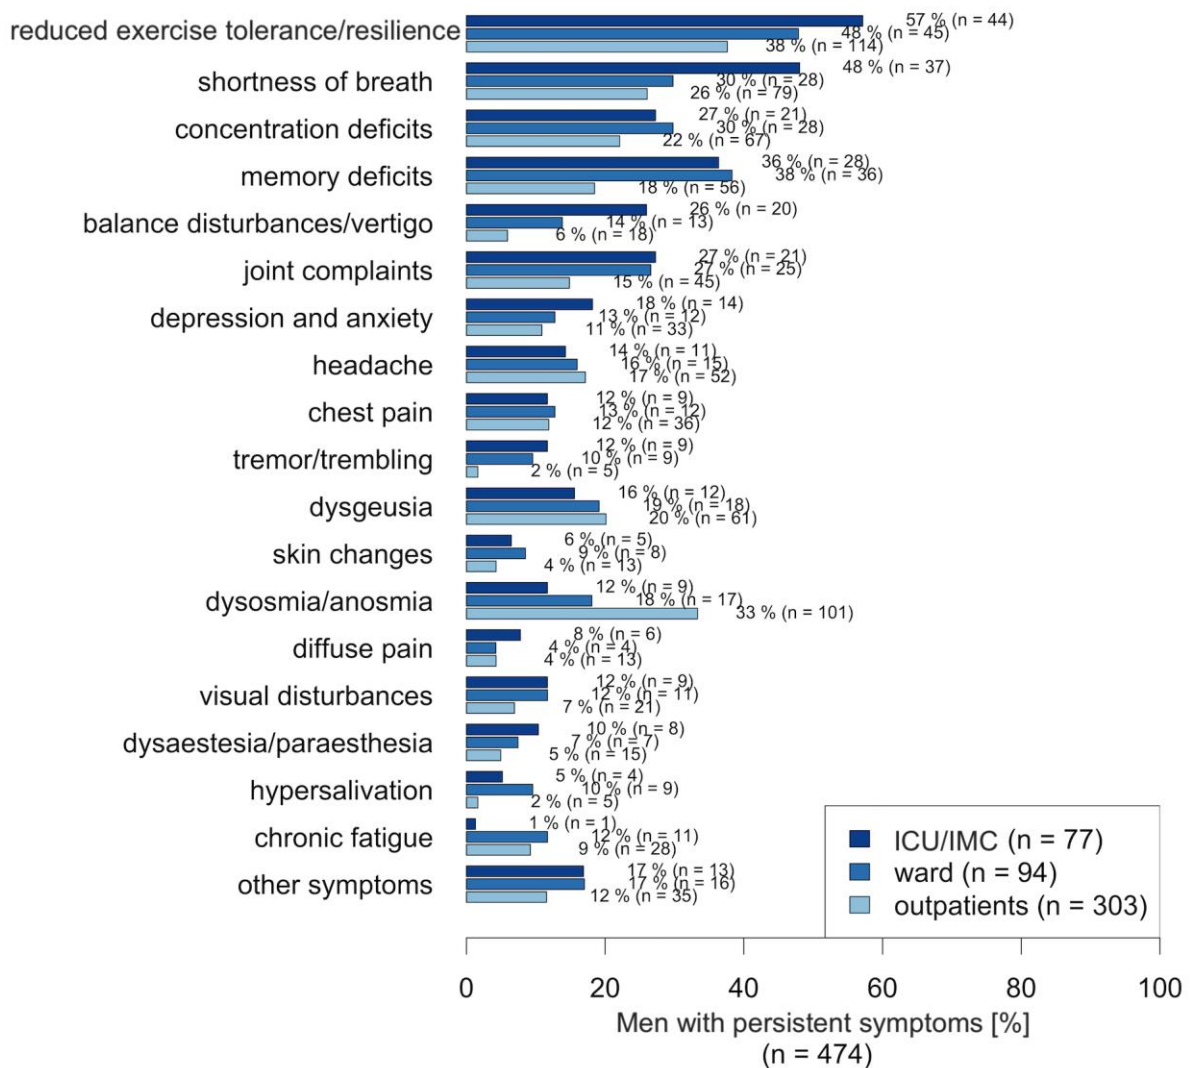

**Supplementary Figure 5:** Persistent symptoms in men stratified by disease severity of acute COVID-19 illness. IMC, intermediate care unit; ICU, intensive care unit. Data are presented as percentage of men reporting persistent symptoms (n=474).

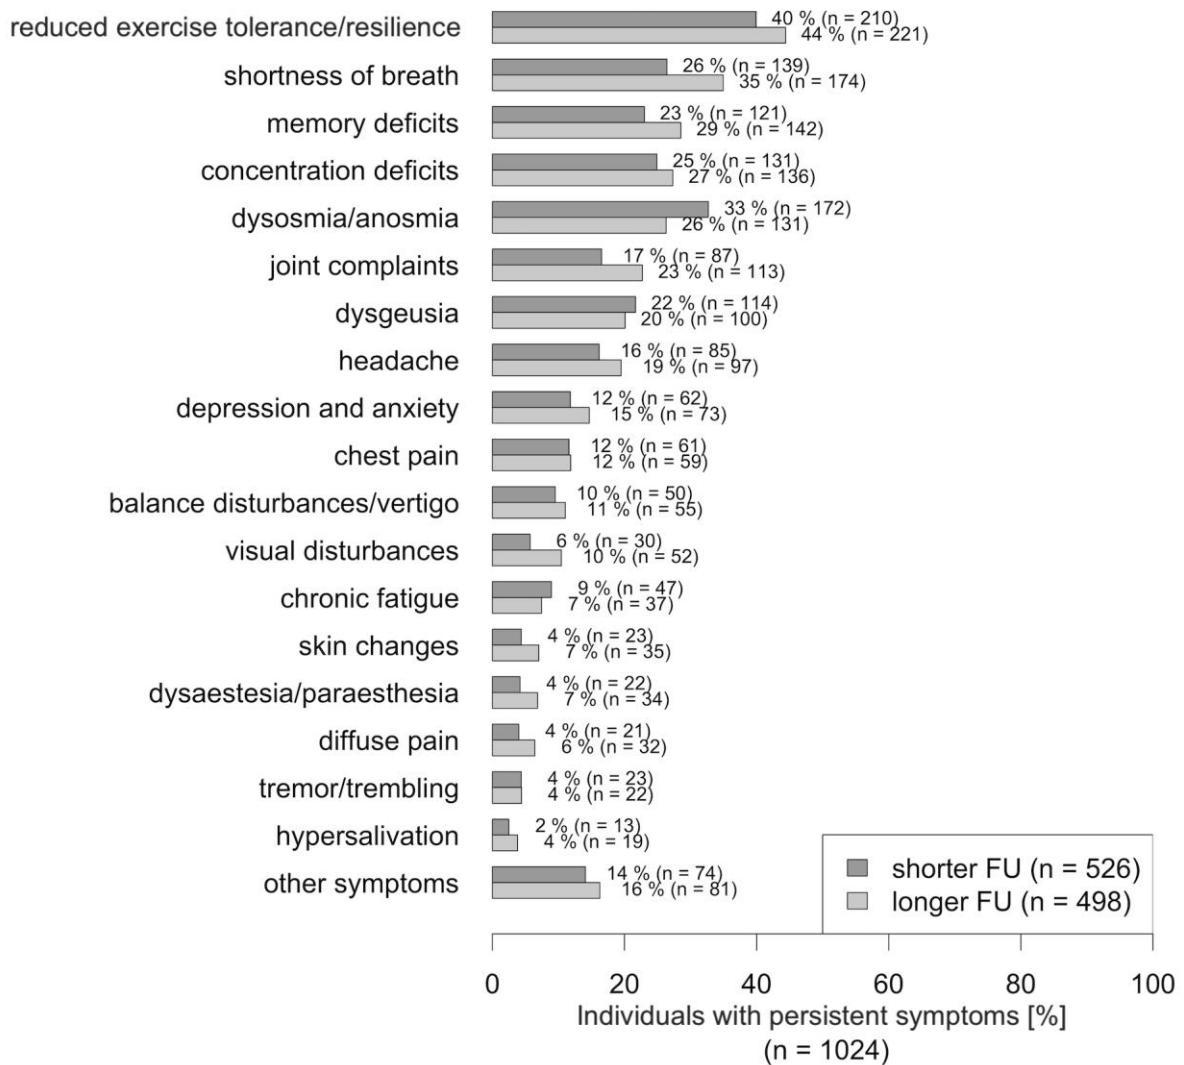

**Supplementary Figure 6:** Persistent symptoms in women and men stratified by follow-up time. Comparison between patients with shorter follow-up duration (>2 and <6 months) and longer follow-up duration (≥ 6 months). Data are presented as percentage of individuals reporting persistent symptoms (n=1024).
